# Supplementary material for: Fibroblast Growth Factor 19 Improves LPS-Induced Lipid Disorder and Organ Injury by Regulating Metabolomic Characteristics in Mice
Source: Oxid Med Cell Longev. 2022 Jul 6;2022:9673512. doi: 10.1155/2022/9673512 (PMC9279090; doi:10.1155/2022/9673512)
Supplement: Supplementary Materials — The Supplementary Material for this article can be found online. [file 9673512.f1.zip]

Archive with 2 entries (2 files):
- Supplementary materials (2).docx
- Supplementary Figure 1.docx
